# Supplementary material for: The Evidence for Effective Inhibition of INa Produced by Mirogabalin ((1R,5S,6S)-6-(aminomethyl)-3-ethyl-bicyclo [3.2.0] hept-3-ene-6-acetic acid), a Known Blocker of CaV Channels
Source: MDPI journal article supplement (doi:10.3390/ijms23073845), 2022-03-31
Supplement: s1 [file s1]

## Supplementary Information

### *Kinetic evaluation for MGB-induced block of $I_{Na(T)}$ evoked by short step depolarization in pituitary GH<sub>3</sub> cells*

During cell exposure to MGB, apart from the reduction in peak  $I_{Na}$  (i.e.,  $I_{Na(T)}$ ), the inactivation rate of the current elicited by brief depolarizing pulse from -100 to -10 mV was noticed to become elevated. Hence, we extended our investigations to evaluate the inactivation kinetics of MGB-mediated suppression of  $I_{Na(T)}$  in situations where GH<sub>3</sub> cells were exposed to different MGB concentrations. The concentration dependence of  $I_{Na}$  inactivation rate (i.e.,  $1/\tau_{inact(S)}$ ) caused by adding this drug was constructed and is hence illustrated in **Figure 2B**. The observations indicated that its effects on  $I_{Na(T)}$  resulted in a concentration-dependent increase in the slow component in rate of current inactivation, since the inactivation trajectories of the current were well fitted at various MGB concentrations to two-exponential process. As a result, the inhibitory effect on  $I_{Na(T)}$  inherently in GH<sub>3</sub> cells can be reasonably explained by a state-dependent blocking mechanism through which the MGB molecule can predominantly bind to the open or open-inactivated state residing in the Nav channels. The first-order binding scheme for this perspective is thus simplified as follow.

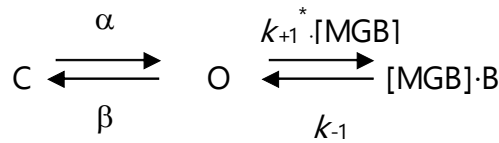

where  $\alpha$  and  $\beta$  are called the rate constants for the opening and closing of the Nav channel, respectively;  $k_{+1}^*$  and  $k_{-1}$  are those for blocking (i.e., depending on the MGB concentration) or unblocking by adding MGB;  $[MGB]$  is the MGB concentration used. C, O, and  $[MGB] \cdot B$  indicate the closed (or resting), open, and blocked states of the Nav channel, respectively.

The blocking (forward,  $k_{+1}^*$ ) and unblocking (backward,  $k_{-1}$ ) rate constants were estimated based on the slow component of the inactivation time constant ( $\tau_{inact(S)}$ ) of  $I_{Na(T)}$  during cell exposure to different MGB concentrations (**Figure 2B**). The relationship can be satisfied by

$$1/\tau_{inact(S)} = k_{+1}^* \times [MGB] + k_{-1}$$

where  $k_{+1}^*$  and  $k_{-1}$  were respectively derived from the slope (i.e.,  $\Delta(1/\tau_{inact(S)})/\Delta([MGB])$ ) and from the y-axis intercept at  $[MGB]=0$  (i.e., the point at which the line crosses the y-axis) of the linear regression at which the reciprocal time constants of the current (i.e.,  $1/\tau_{inact(S)}$ ) versus the MGB concentration was interpolated. The blocking and unblocking rate constants were therefore estimated to yield  $0.124 \text{ msec}^{-1} \mu\text{M}^{-1}$  and  $0.102 \text{ msec}^{-1}$ , respectively. According to the evolving rate constants, dividing  $k_{-1}$  by  $k_{+1}^*$  gave a dissociation constant ( $K_D$ ) of  $8.2 \mu\text{M}$  during exposure to MGB, a value that was noticed to be close to effective  $IC_{50}$  ( $7.3 \mu\text{M}$ ) of the drug needed for inhibition of late  $I_{Na}$  (**Figure 1B**).
